# Supplementary material for: Identification of Substrain-Specific Mutations by Massively Parallel Whole-Genome Resequencing of Synechocystis sp. PCC 6803
Source: PubMed Central journal article supplement — DNA Res. 2011 Dec 22;19(1):67–79. doi: 10.1093/dnares/dsr042 (PMC3276265; doi:10.1093/dnares/dsr042), 2011-12-22

## Supplemental table I. Primers used in this study

| Position        | Primer F                           | PrimerR                     |
|-----------------|------------------------------------|-----------------------------|
| 69849           | TATTGGACAGCGCCCGTCAACTT            | GAAGACCGGGTGAAAGAAGTAGAAA   |
| 125218          | ATCGGTTTCGTGGTTAGCGGTTT            | ATTGGCCGCTGACCAAGGAAGTT     |
| 125262-125273   | ATCGGTTTCGTGGTTAGCGGTTT            | ATTGGCCGCTGACCAAGGAAGTT     |
| 126257          | ACCGTTTTCTCAGAGTAGGGAATACC         | GATTATGGGGACTTCTGTGTCCAA    |
| 386410-386411   | GAGCCCCGCTGTTTAAACAATT             | TTTTTTGACCGGCTGACAGGGATT    |
| 387006          | ATTTGATCAGGAAGTTGCCCA              | TCGCTGAGCACAATAATAGCCTCT    |
| 731367          | GAGAATTTTAACCAGTTCGCCCA            | ACCGTCGCAGTCAAATTCCTTT      |
| 781625-781626   | CCCCGTTAATTTTTCTTACCATG            | TTTCCCCCTCTCTCATTAGAATAAAG  |
| 831647          | GGCTGTTGGTTTACACAGAGCAA            | TACGACGAATTTTGCCGGAGAT      |
| 842060          | TAGCAACCCTTAGGGTCAGAGAA            | CTGGCTACCAAAAACGCCATAA      |
| 909360          | ACAATTGGGGCAATCAAGTACCAC           | GCGATCGAGTATAATGTTGCCAT     |
| 943495          | TCCACGCTTTTACCATCCACGTAA           | AACCGTAGGAGTTGATGACGTTGG    |
| 1012958         | AGACAGTGCCATCAACAACAACACC          | TAActCTGGTTCCTAGGGGCAGACT   |
| 1192983         | CGTGTGGAGAAACAGGATTGG              | GGCAGGAATAGCATCGTAATCATC    |
| 1200143-1201488 | AAAGTGTGAGTGAATATTTGGGGG           | CCAGGCAAAGAAAAGAAAATATTCTTG |
| 1204616         | AAATGCCATCAAGGCCGGTAAT             | CAGACATAGGTAAACCAATGGCG     |
| 1300941-1300985 | GGGGGCTAACCTGCTTTTTTGT             | AATCTGCCCGGCTTAAATCTAC      |
| 1364187         | GCCGGGGTAACCAGTAAAAAT              | GACCGGGTAAAAGGATTTTTTTG     |
| 1392586         | TTGTGGAACGTTCCCTCACTAG             | CACATAATCCCTGGTTTGGGT       |
| 1423340-1423341 | ATGGACTAGATGTCATCGTTGGTGA          | AGTGGCGTAGGGATTGACAAATGT    |
| 1437136         | ACCAAGTACGACGTTGATTTACCT           | GGGGCATTGGAATTTCAAGCT       |
| 1437389         | TATTGAGCTTGTGCAATCTTACCC           | CCTTAACACGTTGCCATAATGTA     |
| 1470212         | AGCAAAGCGGAAGAATTTACCC             | CCTGGTTTGCCAAAGTTTTTCA      |
| 1597057         | GGCGAAAATTGCTTTAGACGCAA            | ATATTGGCTGTACACCGTTCCCAT    |
| 1763998         | AAGGCCACCACCTCCAATAATCA            | CGCTGTAAACTTTTTGGATCATTTCC  |
| 1764198         | CAGTACAAAATGGCACCGTTGA             | TCAATGGTGCCCCGGTCTAGAG      |
| 1812419         | TTTTAGAATCATTAATCCCGGCAA           | AACCGATGCGAGCCTTGAGTAATA    |
| 2048341-2049583 | ATTTCAATGATGGCCCGGATAG             | AGGGTGTATGGCAGGCGTAAA       |
| 2092571         | GTTGAATCGTTGAGTCAATCCTCG           | ATGGCAAATCCATCACGGAAG       |
| 2198893         | ACCGTCTAAAGCAGTTTGGACTGTCT         | TCGTGGATGACATCCTCATCAAT     |
| 2204584         | GTTAGTGTCAAGGACAAAGCGTT            | CGGCCATTGGACTTCTTAAAAAG     |
| 2301721         | ACCTGACTTACATCGAAGATCATGAC         | GCAGCAAAGGAAGCATAAAATACC    |
| 2350285-2350286 | GCACCAAATTAGTCTAGGGAGAGAAG         | GTAAACGGCGCAGTTGTTCCAC      |
| 2360245-2360246 | AGTTTGTGATTGACACCACTCCTC           | AAAGGTATAGGTCGTGCCGTTAAAG   |
| 2370197         | GCGGATTTAGACCAAGCCCTAAAA           | ATTATCGACAGTAAATCCGAGGGCCA  |
| 2409244         | AGGATTAAGGCCGTAGTCCGTTA            | ATCTATCGCCGGGGAAAGATAAT     |
| 2419399         | AACTGACTGATATCCTTGAGGGCTT          | CTGGATAAGGACTGTAATCCGGAA    |
| 2521013         | CTGCCAATTTTCTTTGGCATGAG            | GTTGTTTTTCTCTGTAGAAAGACGATC |
| 2544044-2544045 | AAAATCCGGTAAGGTATGCCGA             | AACCAAGGGGGAAAATGGGGAAT     |
| 2580625         | GACTACTGGGGTAATAGTGGCTGTG          | CCTGGTAATGGGTTCAAATTGGGT    |
| 2580626         | GACTACTGGGGTAATAGTGGCTGTG          | CCTGGTAATGGGTTCAAATTGGGT    |
| 2602717         | CCTATTTGGGCGATTCTAGAAA             | GGATAAACACCTTTATGAACCATTGTC |
| 2602734         | CCTATTTGGGCGATTCTAGAAA             | GGATAAACACCTTTATGAACCATTGTC |
| 2674108         | TAGGTCATTGGGGCTTGACAAT             | GGAAGCGGCCAGAGAATAGATAA     |
| 2736514-2736515 | CCCTATATTATTATCGCCCCCTTTAC         | ATGATCAACAGATGGTTACCGGGA    |
| 2748897         | GAAGACCAGAGAGATTTGTTTCAACCT        | ATAACACCGATGCCAATCCAAG      |
| 2881614-2881615 | TCCCTTTTGAACAAGCCCTCAT             | GTAAAAATTGACTTGCTTCCGGGTC   |
| 3014665         | TTGCTAAATTAGGCTTCTGGCG             | CAAACAAATTCCTAAAGCGGGC      |
| 3096187         | GGAGTGTCAAACCGGGATAGTTTAGTT        | TCACCATTTTCCATTCTTACC       |
| 3098707         | AATGGATAATGCTCCTATTCATCGT          | TGGTCGTTACCTCTTTATTACAAGTGT |
| 3142651         | AATTGGTGAGAAAGTCTGGTGCC            | AGTGTCCATGGTTAATTCCGGG      |
| 3260096         | GTCCAATGAAAAGTAACGATTGAGG          | CACCGTTAACGCCAATCAATCT      |
| 3400322-3401506 | Outer TTCAAGAACTTTGACCTAAAGCAGAAGT | TTGCAGACTTTGTATTTGAGGCCAG   |
| 3400322-3401506 | Inner TTGGGTGGAATTTAGTCTGGTGC      | CTTCAACGGTAACTGATTGCCAT     |

\*To avoid to amplify the multicopy region, the locus 3400322-3401506 were amplified from far-outside region.

### Supplemental Figure 1

Distribution of 1 kb-averaged read depth calculated by mapping programs; BWA and MAQ. Horizontal axis indicates the genomic locus of *Synechocystis* sp. PCC 6803 and vertical axis indicates the read depth. Title of each panel shows the name of mapping program and of the substrain. The genome sequence of the Kazusa strain in the database (NCBI accession number; NC\_000911), was used as the reference for mapping analyses.

**BWA\_GT-I**

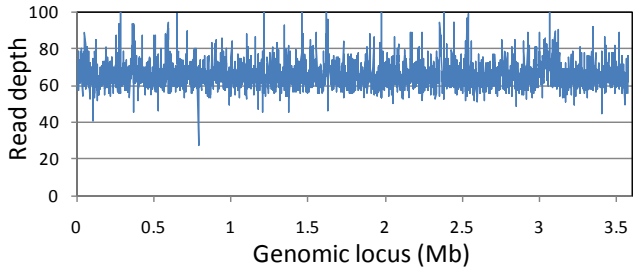

**MAQ\_GT-I**

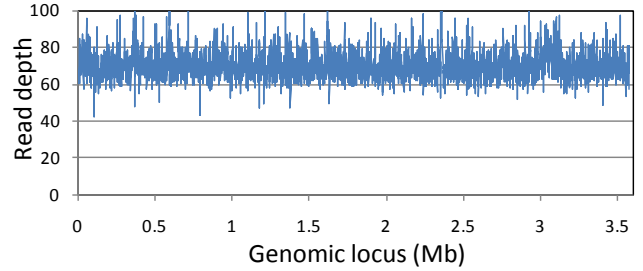

**BWA\_PCC-P**

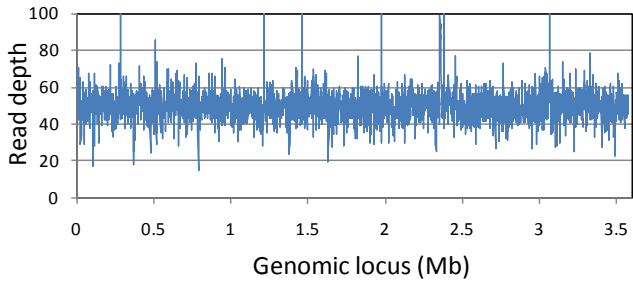

**MAQ\_PCC-P**

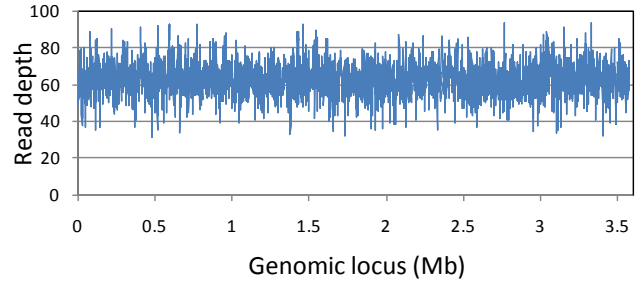

**BWA\_PCC-N**

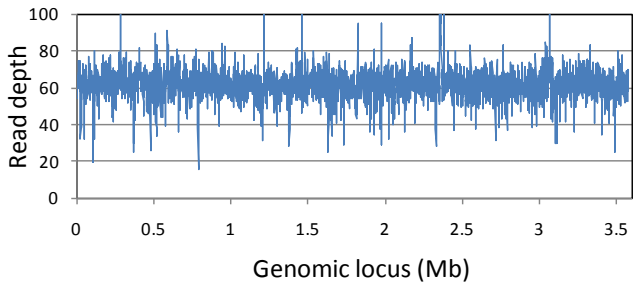

**MAQ\_PCC-N**

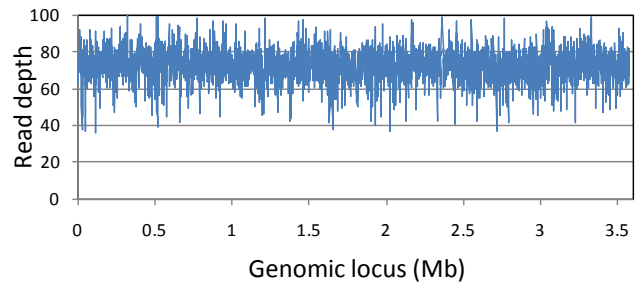

Supplement: supp_dsr042_dsr042supp.pdf [file supp_dsr042_dsr042supp.pdf]
